# Supplementary material
Source: PubMed Central journal article supplement (PMC3234721)
Supplement: supp_M111.231498_jbc.M111.231498-1.pdf [file supp_M111.231498_jbc.M111.231498-1.pdf]

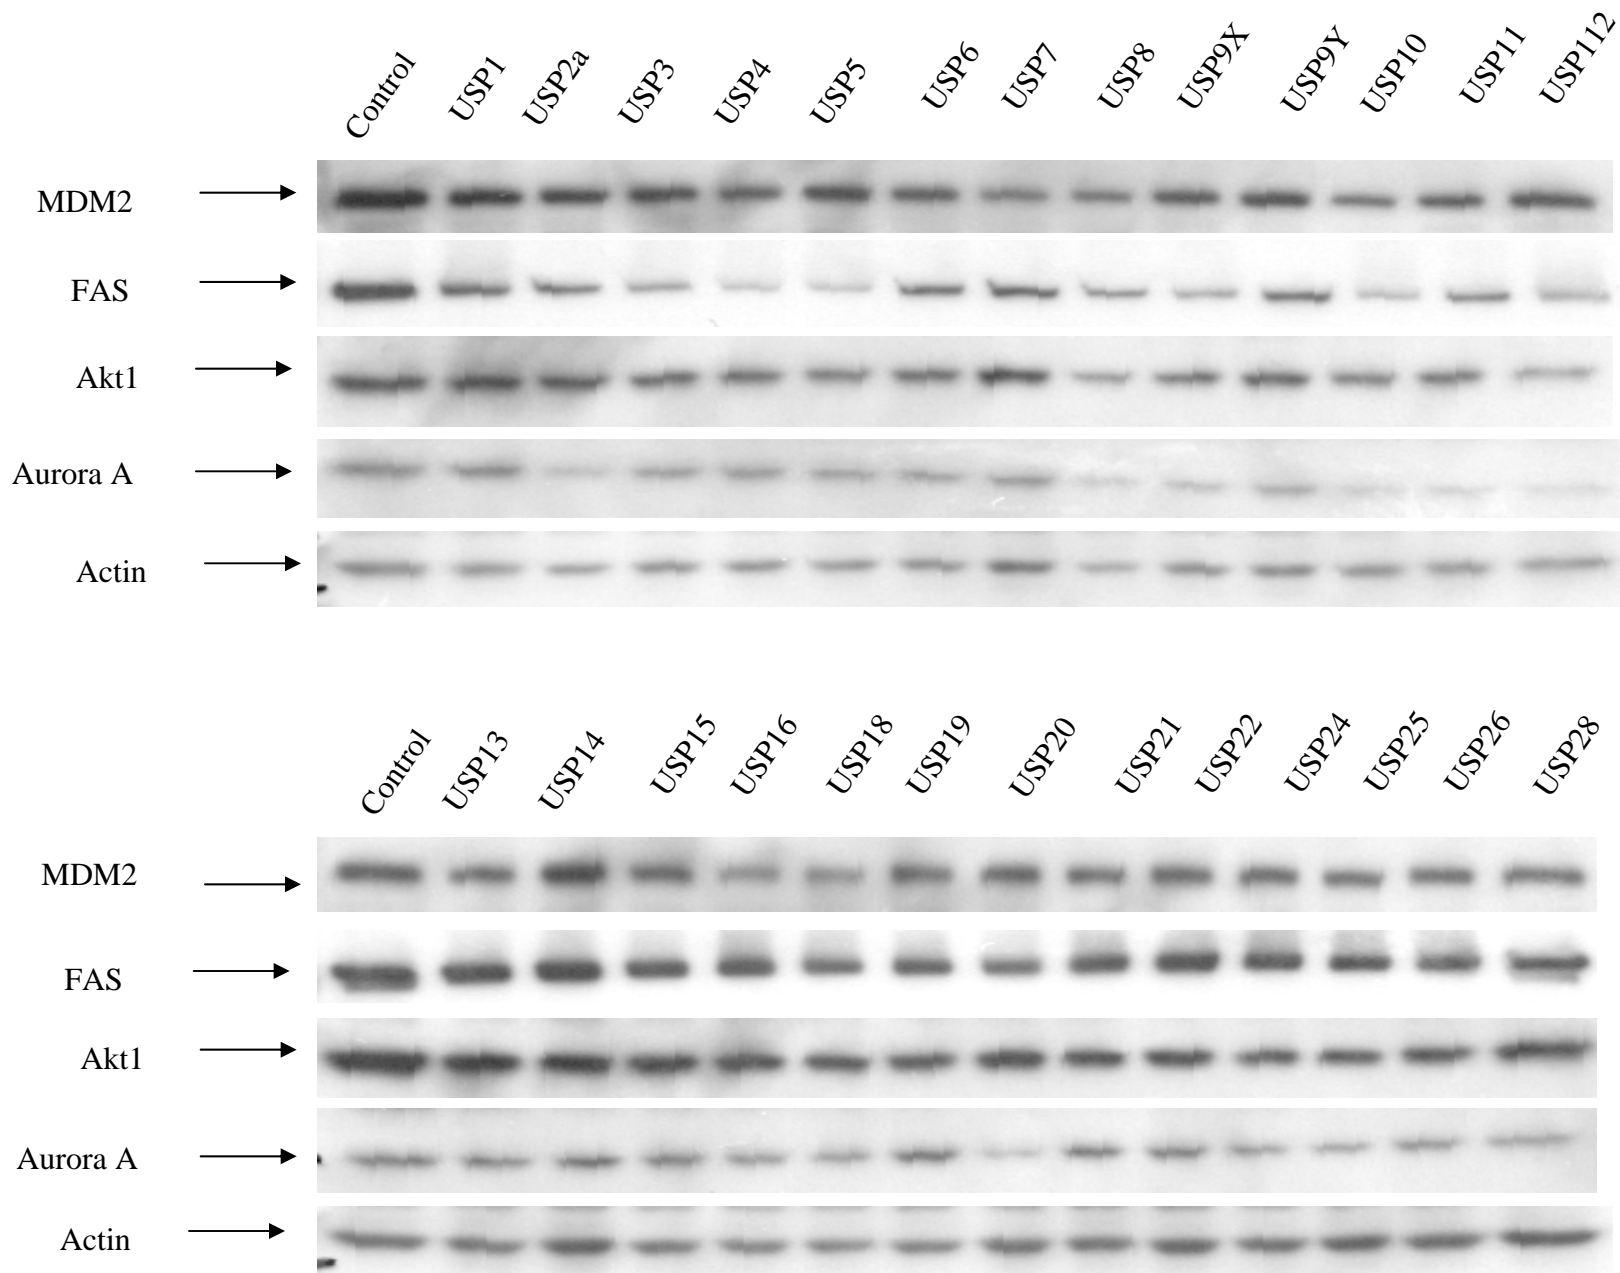

Fig.S1

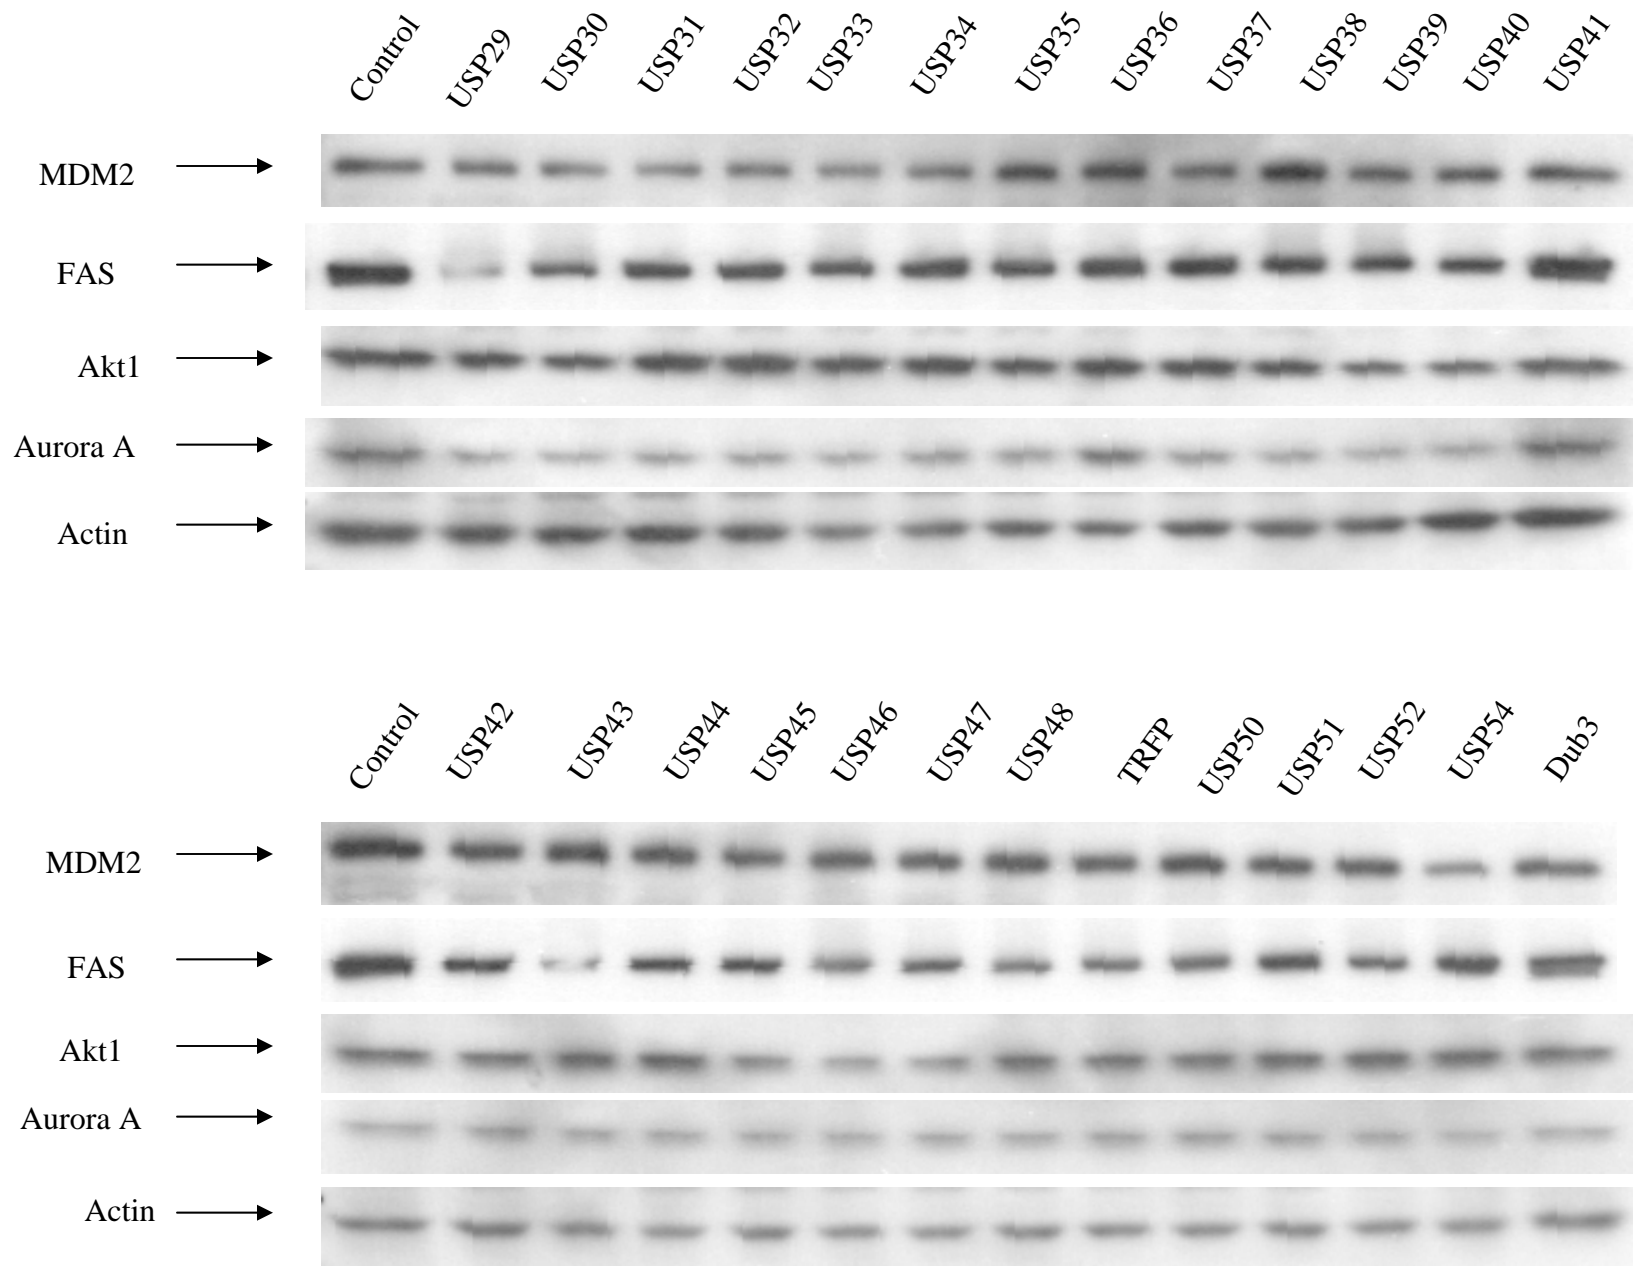

Fig.S1

Supplementary Figure legend

Figure S1. MiaPaCa-2 cells were transfected with the indicated pools of USP siRNA for 72 hours. The cells were harvested and western-blot analysis was carried out for MDM2, FAS, Akt1, Aurora-A, and Actin.
